# Supplementary material for: Hsa-miR-520d-5p promotes survival in human dermal fibroblasts exposed to a lethal dose of UV irradiation
Source: PubMed Central journal article supplement — NPJ Aging Mech Dis. 2016 Nov 24;2:16029–. doi: 10.1038/npjamd.2016.29 (PMC5515008; doi:10.1038/npjamd.2016.29), 2016-11-24
Supplement: npjamd201629-s2.pdf [file npjamd201629-s2.pdf]

## Supplemental Table 1

| Gene           | Sense                         | Antisense                      | product size(bp) |
|----------------|-------------------------------|--------------------------------|------------------|
| miR-520d-5p    | 5'-TCTACAAAGGGAAGCCCTTTCTG-3' |                                |                  |
| $\beta$ -actin | 5'-ACCTGACTGACTACCTCATG-3'    | 5'-GCAGCCGTGGCCATCTCTTG-3'     | 146              |
| Oct4           | 5'-CGGAAAGAGAAAGCGAACCA-3'    | 5'-CGGACCACATCCTTCTCCAG-3'     | 135              |
| Nanog          | 5'-CAGAAGGCCTCAGCACCTAC-3'    | 5'-ACTGGATGTTCTGGGTCTGG-3'     | 145              |
| p53            | 5'-GCTTCGAGATGTTCCGAGAG-3'    | 5'-TTATGGCGGGAGGTAGACTG-3'     | 133              |
| AICDA          | 5'-CGTAGTGAAGAGGCGTGACA-3'    | 5'-TGTAGCGGAGGAAGAGCAAT-3'     | 102              |
| CD105          | 5'-GGTCATACCACAGCCTTCATC-3'   | 5'-AGGGTCAGGAGAAGTGGACA-3'     | 149              |
| TERT           | 5'-GTGCACCAACATCTACAAGATCC-3' | 5'-GTTCTTCCAACTTGCTGATGAAAT-3' | 144              |
| CASP3          | 5'-TTCTTGGCGAAATTCAAAGG-3'    | 5'-CGGTTAACCCGGGTAAGAAT-3'     | 111              |
| ATM            | 5'-CCTTTTGAAGGCCTGGATGA-3'    | 5'-TTTGTGCCTCCACTGTCCAA-3'     | 138              |
| ATR            | 5'-TTGGATGTGCTTGGAAATTGA-3'   | 5'-CCTGTTGAGTTTGGCATTGA-3'     | 115              |
| OTUB1          | 5'-GTCTGCCAAGAGCAAGGAAG-3'    | 5'-GAGGTCTGCTTCTCCACCTG-3'     | 111              |
| BRCA1          | 5'-AACCACAGTCGGGAAACAAG-3'    | 5'-GGATTTGAAAACGGAGCAA-3'      | 113              |
| c-Abl          | 5'-GCCATGGAGTACCTGGAGAA-3'    | 5'-TGTGTAGGTGTCCCCTGTCA-3'     | 135              |
| Chk1           | 5'-ACGGAGTTCCTCCCATTCT-3'     | 5'-TCACAGTCGGTGAAGCAGAG-3'     | 109              |
| SIRT1          | 5'-CAGTGGCTGGAACAGTGAGA-3'    | 5'-AGCGCCATGGAAAATGTAAC-3'     | 122              |
| DICER          | 5'-GCTACCCAAAAGCAATTCCA-3'    | 5'-AGGATAGAGCTTCCGCCTTC-3'     | 140              |
| CtIP           | 5'-CGTTTGTGGAGCCGTATTTT-3'    | 5'-TGCCCAAGCAGTTTTCTTCT-3'     | 109              |
| FANCD2         | 5'-CCTGAGCTGCTTTTCTTGCT-3'    | 5'-CGGCTTCCTTTGTTCTTGAG-3'     | 104              |
| Rad50          | 5'-CCAGGTCCTGGTGAGATTA-3'     | 5'-CAAAATTGTAAGGGGGCTGA-3'     | 137              |
| Rad51          | 5'-GGAATGGGTCTGCACAGATT-3'    | 5'-GGTTTGGCACAAAGACTCCAT-3'    | 116              |
| Rad52          | 5'-CCCAAGTCTGAACGTGGAAT-3'    | 5'-ATGCAGCGACCCTAAGAGAA-3'     | 143              |
| H2AX           | 5'-AGCAAACCTCAACTCGGCAAT-3'   | 5'-AACTCCCAATGCCTAAGGT-3'      | 142              |
