# Supplementary figures and images for: Hsa-miR-520d-5p promotes survival in human dermal fibroblasts exposed to a lethal dose of UV irradiation
Source: PubMed Central journal article supplement — NPJ Aging Mech Dis. 2016 Nov 24;2:16029–. doi: 10.1038/npjamd.2016.29 (PMC5515008; doi:10.1038/npjamd.2016.29), 2016-11-24

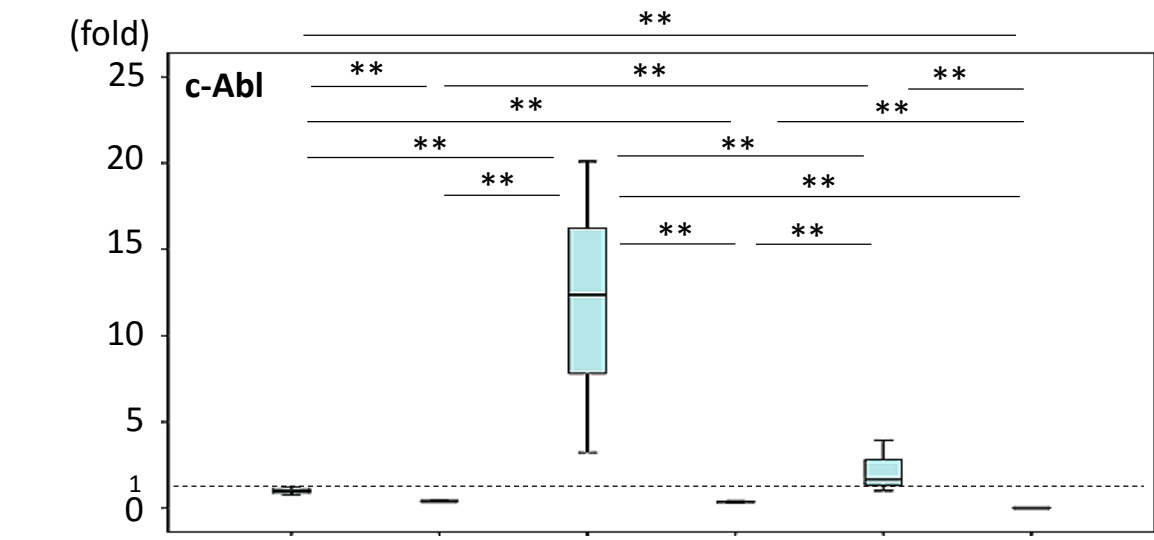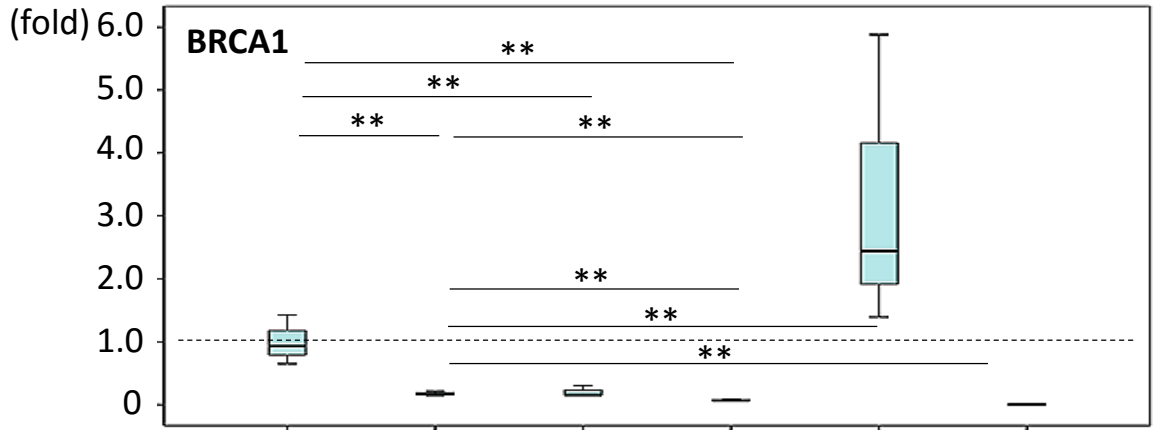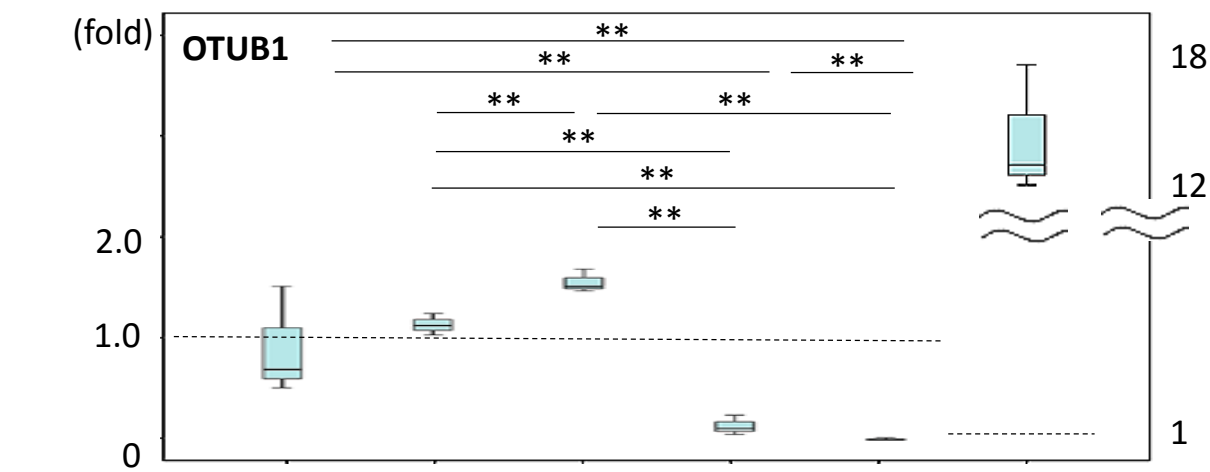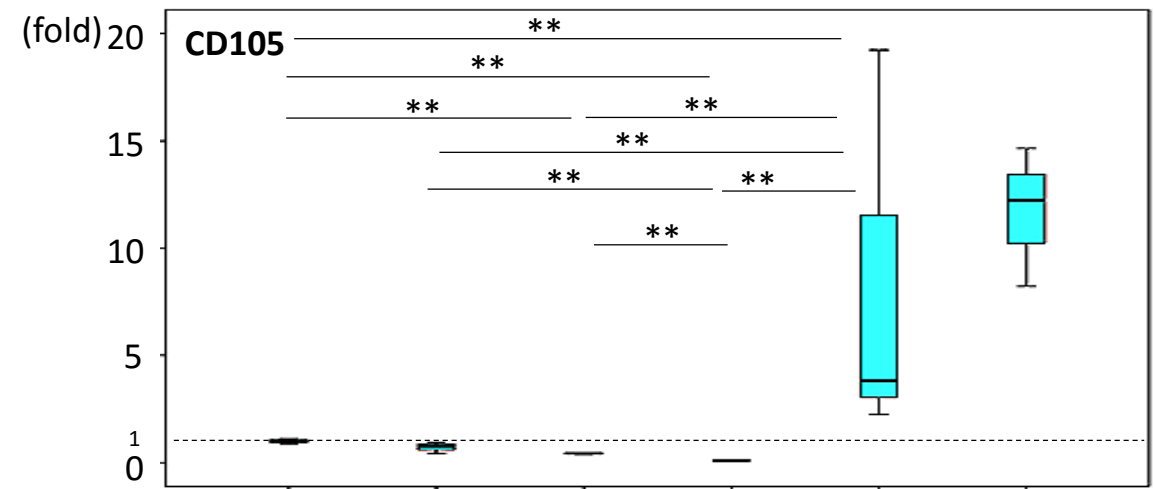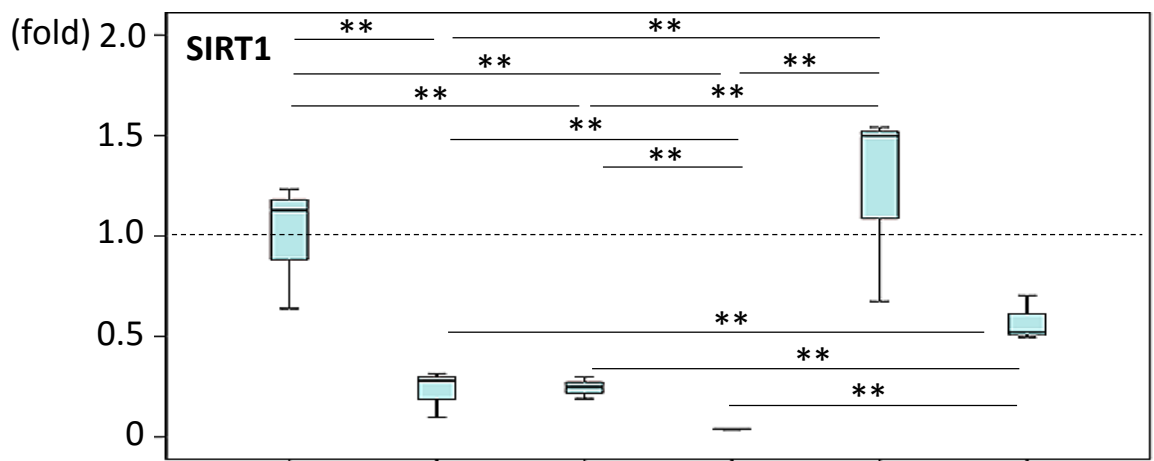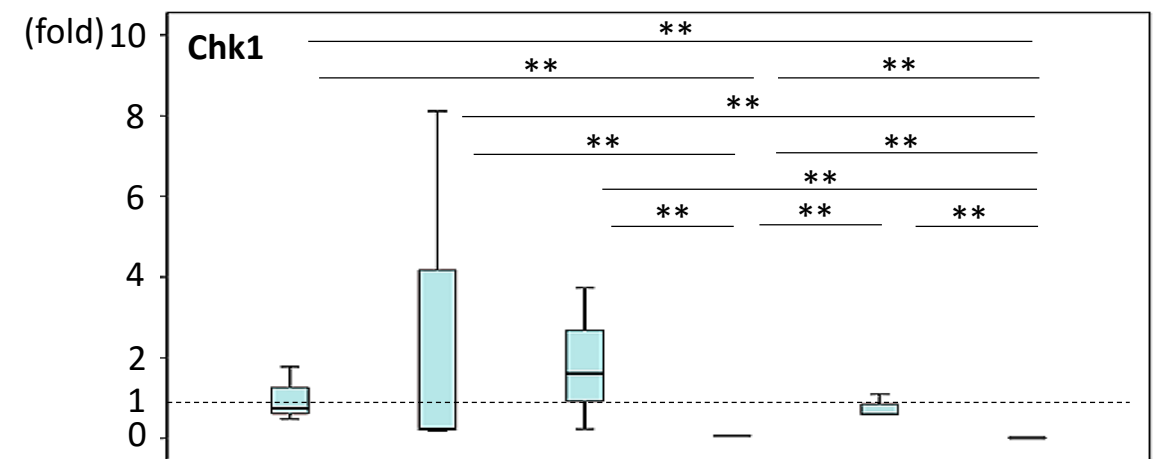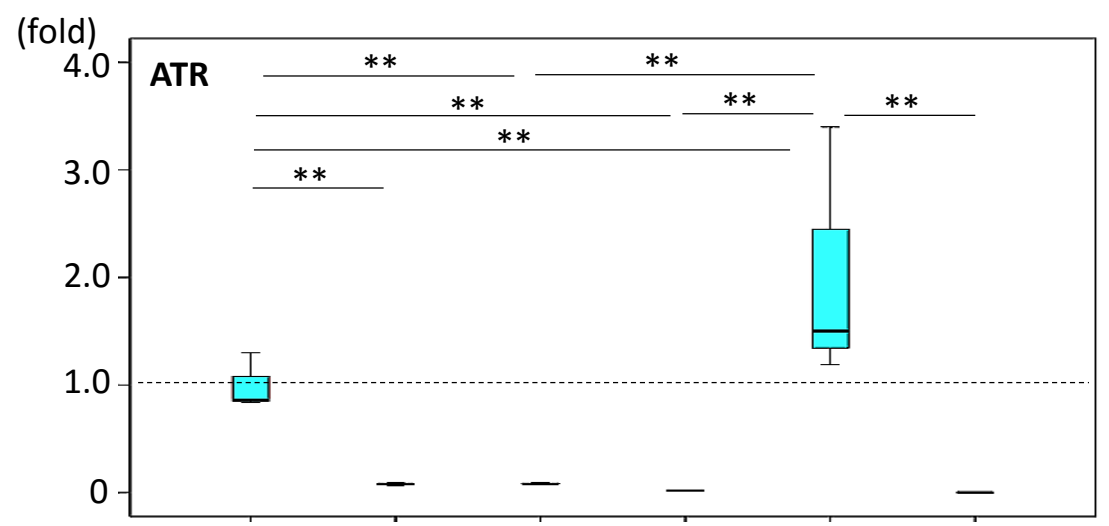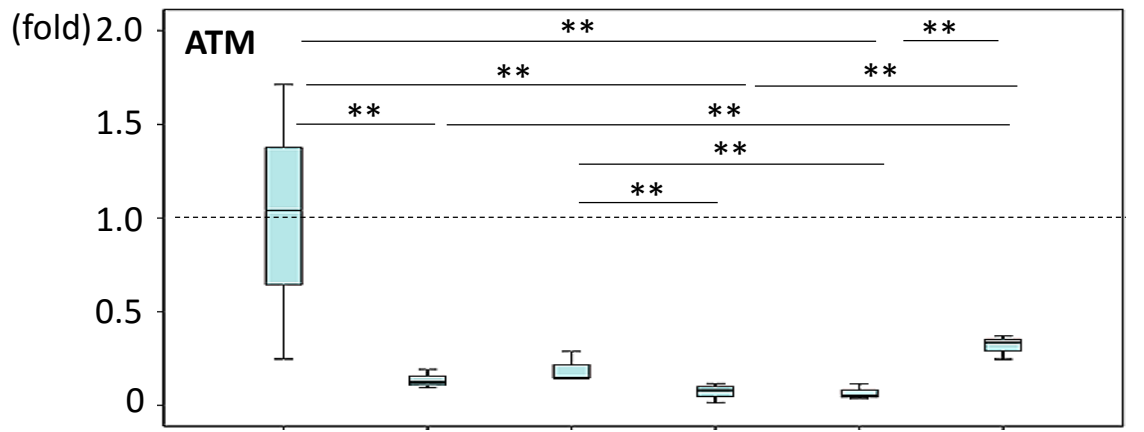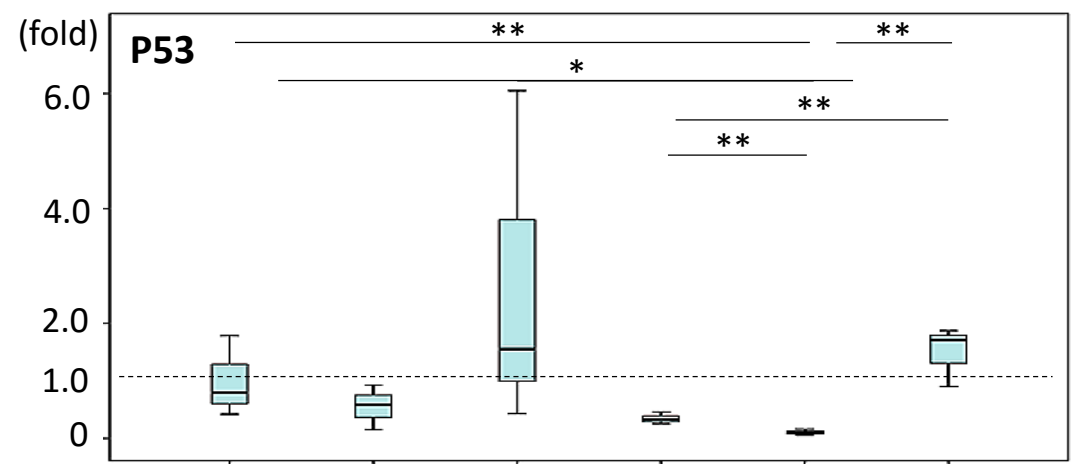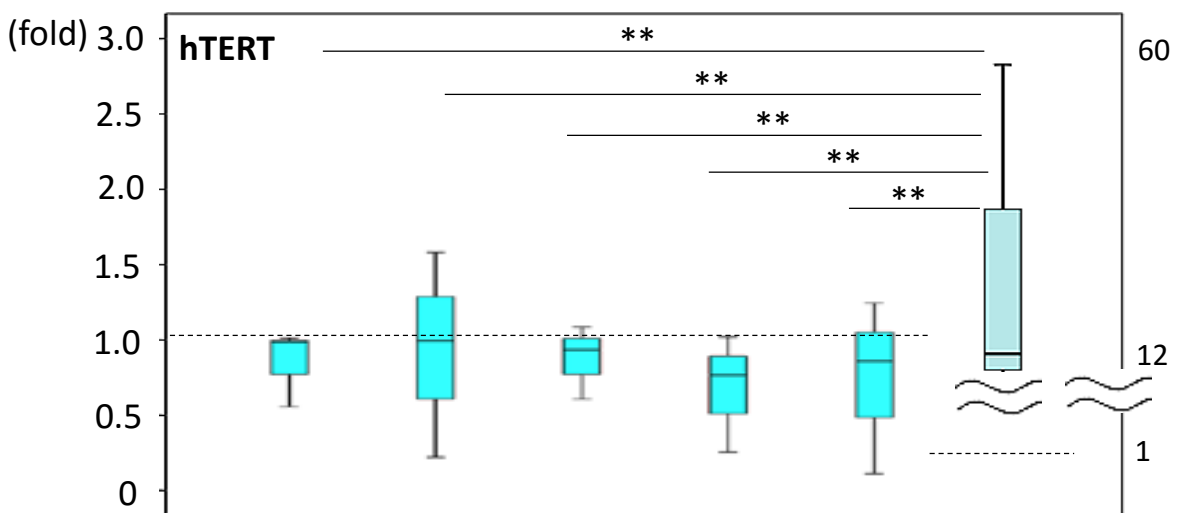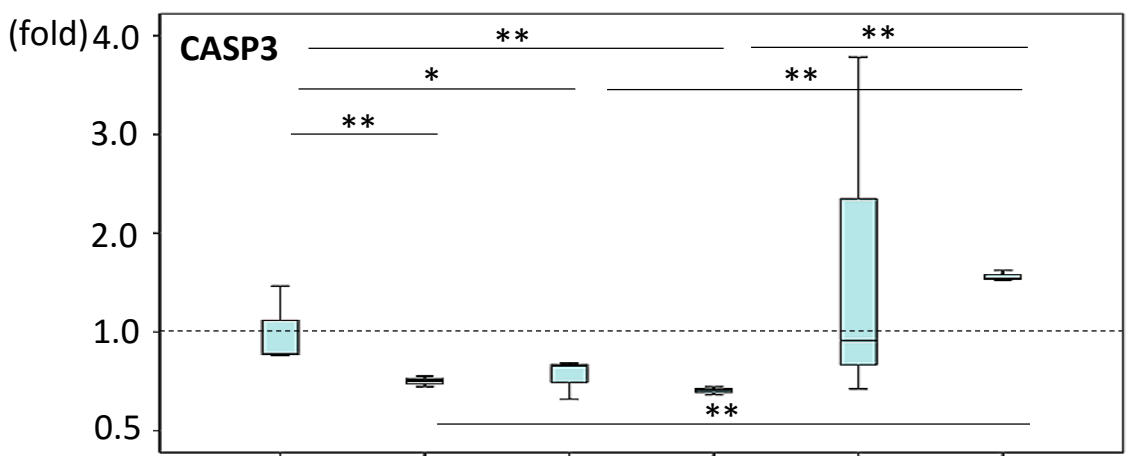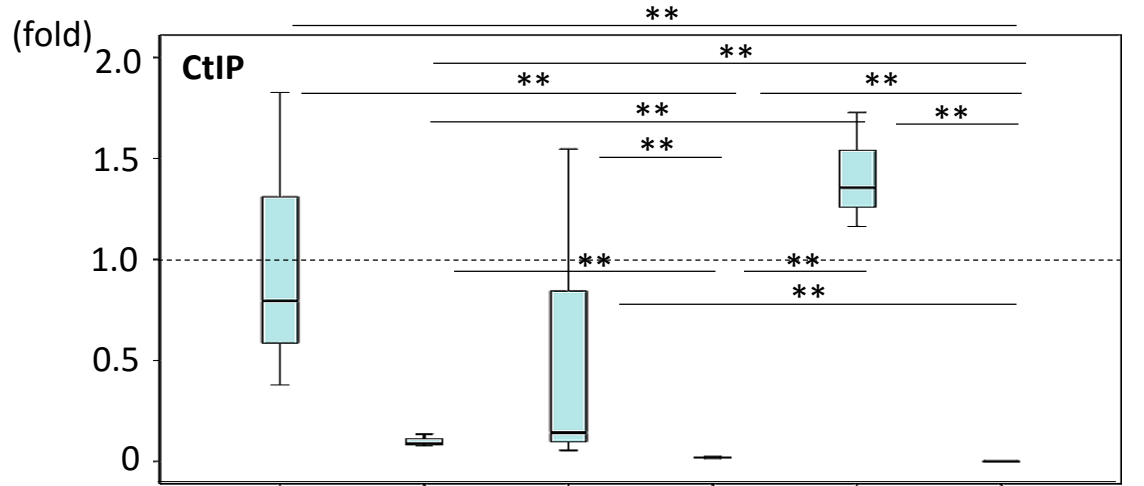

|                       |   |   |   |   |    |    |
|-----------------------|---|---|---|---|----|----|
| scram.                | + |   |   |   |    |    |
| miR-520d              | - | + | + | + | +  | +  |
| UV                    | + | + | + | + | +  | +  |
| day after irradiation | 0 | 1 | 1 | 2 | 35 | 75 |

|                       |   |   |   |   |    |    |
|-----------------------|---|---|---|---|----|----|
| scram.                | + |   |   |   |    |    |
| miR-520d              | - | + | + | + | +  | +  |
| UV                    | + | + | + | + | +  | +  |
| day after irradiation | 0 | 1 | 1 | 2 | 35 | 75 |

Supplement: npjamd201629-s1.pdf [file npjamd201629-s1.pdf]
